# Supplementary material
Source: Springer Nature journal article supplement (https://www.springermedizin.de/resource/supplementary/12879_2012_2251_MOESM1_ESM.pdf/9443770)
Supplement: MOESM1 [file 9443770]

Patients with chronic hepatitis infected with HCV genotype 1b and pretreatment HCV RNA levels  $\geq 5.0 \log_{10}$  IU/mL who underwent antiviral therapy with peginterferon alpha and ribavirin between December 2004 and January 2010. (N=808)

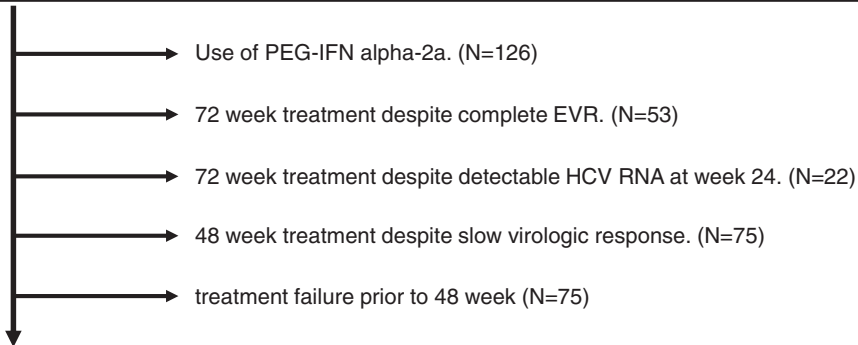

Study patients.(N=516)
